# Supplementary material for: MRI-based deep learning models for automatic segmentation and pretreatment risk stratification in operable cervical squamous cell carcinoma: a multicenter study
Source: Research Square preprint supplement (doi:10.21203/rs.3.rs-7891003/v1), 2025-11-10
Supplement: Supplementary file 1 [file 2608dbdece2f5c2e03a80d78.docx]

**Supplementary Material**

**Supplementary Method S1.** Sedlis criteria for external pelvic radiation after radical hysterectomy in patients with high-risk factors.

**Supplementary Method S2.** Magnetic resonance image acquisition parameters used in the present study.

**Supplementary Method S3.** Image preprocessing.

**Supplementary Method S4.** Habitat analysis.

**Supplementary Figure S1.** The ROC curves, calibration curves and decision curve of different 2.5D DL classification models.

**Supplementary Table S1.** Prediction performance of different 2.5D DL models in the test cohort.

**Supplementary Method S1.** Sedlis criteria for external pelvic radiation after radical hysterectomy in patients with negative lymph nodes, negative margin and negative parametria invasion

Sedlis criteria were developed primarily for squamous cell carcinoma. Depth of invasion is an important risk factor of recurrence for squamous lesions. Tumor size is an important risk factor for cervical adenocarcinoma, and this risk becomes more pronounced with the presence of LVSI. If all three criteria listed in each row of the table below are fulfilled, the patient will be classified as intermediate-risk group.

| **LVSI** | **Stromal Invasion** | **Tumor Size (cm)** |
| --- | --- | --- |
| + | Deep 1/3 | Any |
| + | Middle 1/3 | ≥2 |
| + | Superficial 1/3 | ≥5 |
| - | Middle or deep 1/3 | ≥4 |

**Supplementary Method S2.** Magnetic resonance image acquisition parameters used in the present study

All magnetic resonance imaging (MRI) data from four institutions were acquired using 1.5-T or 3.0-T MRI scanners. The pelvic MR imaging protocol included the following sequences: (I) contrast-enhanced T1-weighted imaging (ceT1WI), (II) T2-weighted imaging (T2WI), and (III) diffusion-weighted imaging (DWI). The T1c sequence was acquired immediately after intravenous administration of a gadolinium-based contrast agent at a dose of 0.1 mmol/kg.

***The Second Hospital of Jilin University (Center 1):*** The patients from Second Hospital of Jilin University were examined using the 1.5T GE Signa oreator MRI, the 3.0T GE Pioneer MRI, and the 3.0T Philips Ingenia MRI.

The 1.5T GE Signa oreator MRI acquisition parameters were as follows: axial T2WI (TR/TE, 2267/86 ms; FOV, 320 × 320 mm2; number of excitations (NEX), 4; matrix, 320×256; slice thickness, 7 mm; slice gap, 1 mm; flip angle (FA) , 160° ) . Axial ceT1WI (TR/TE, 7.2/2.1 ms; FOV, 360 × 360 mm2; NEX, 4; matrix, 320×256; slice thickness, 3 mm; slice gap, 0 mm; FA, 20° ). Axial DWI (TR/TE, 4388/86 ms; FOV, 360 × 360 mm2; NEX, 8; matrix, 128×128; slice thickness, 7 mm; slice gap, 1mm; b values of 0 and 800 s/mm2 ).

The 3.0T GE Pioneer MRI acquisition parameters were as follows: axial T2WI (TR/TE, 3793/85 ms; FOV, 240 × 240 mm2; NEX, 1; matrix, 320×224; slice thickness, 7 mm; slice gap, 1.5mm; FA, 110° ) . Axial ceT1WI (TR/TE, 5.9/2.4 ms; FOV, 320 × 320 mm2; NEX, 1; matrix, 288×256; slice thickness, 4 mm; slice gap, 0 mm; FA, 12° ). Axial DWI (TR/TE, 2500/62 ms; FOV, 240 × 240 mm2; NEX, 2; matrix, 128×140; slice thickness, 7 mm; slice gap, 1.5 mm; b values of 0 and 800 s/mm2 ).

The 3.0T Philips Ingenia acquisition parameters were as follows: axial T2WI (TR/TE, 2724/100 ms; FOV, 672 × 672 mm2; NEX, 1; matrix, 400×400; slice thickness, 5 mm; slice gap, 1 mm; FA, 10° ) . Axial ceT1WI (TR/TE, 5.0/1.9 ms; FOV, 420 × 280 mm2; NEX, 4; matrix, 524×348; slice thickness, 6 mm; slice gap, 3 mm; FA, 10° ). Axial DWI (TR/TE, 5000/46 ms; FOV, 288 × 288 mm2; NEX, 1; matrix, 132×121; slice thickness, 5 mm; slice gap, 1 mm; FA, 90°; b values of 0 and 800 s/mm2 ).

***China-Japan Union Hospital of Jilin University (Center 2):*** The patients from China-Japan Union Hospital of Jilin University were examined using the two 3.0T SIEMENS Skyra MRI, the 1.5T SIEMENS Avanto MRI and the 3.0T United Imaging uMR 780 MRI.

The 3.0T SIEMENS Skyra MRI acquisition parameters were as follows: axial T2WI (TR/TE, 4550/106 ms; FOV, 190 × 190 mm2; NEX, 2; matrix, 320×224; slice thickness, 3.5 mm; slice gap, 0 mm; FA, 120° ) . Axial ceT1WI (TR/TE, 53.4/1.4 ms; FOV, 250 × 250 mm2; NEX, 5; matrix, 224×320; slice thickness, 3 mm; slice gap, 0.6 mm; FA, 9° ). Axial DWI (TR/TE, 7000/70 ms; FOV, 240 × 184 mm2; NEX, 1; matrix, 84×110; slice thickness, 3.5 mm; slice gap, 0 mm; b values of 0 and 800 s/mm2 ).

The 1.5T SIEMENS Avanto MRI acquisition parameters were as follows: axial T2WI (TR/TE, 4300/110 ms; FOV, 240 × 240 mm2; NEX, 2; matrix, 179×256; slice thickness, 3 mm; slice gap, 0 mm; FA, 160° ) . Axial ceT1WI (TR/TE, 3.9/1.6 ms; FOV, 300 × 244 mm2; NEX, 3; matrix, 182×320; slice thickness, 3.5 mm; slice gap, 0.7 mm; FA, 12° ). Axial DWI (TR/TE, 6500/790 ms; FOV, 260 × 230 mm2; NEX, 1; matrix, 99×140; slice thickness, 3 mm; slice gap, 0 mm; b values of 0 and 800 s/mm2 ).

The 3.0T United Imaging uMR 780 MRI acquisition parameters were as follows: axial T2WI (TR/TE, 4148/137 ms; FOV, 220 × 220 mm2; NEX, 2; matrix, 230×256; slice thickness, 3 mm; slice gap, 0 mm; FA, 90° ) . Axial ceT1WI (TR/TE, 3.4/1.6 ms; FOV, 400 × 300 mm2; NEX, 1; matrix, 90×320; slice thickness, 3 mm; slice gap, 0 mm; FA, 10° ). Axial DWI (TR/TE, 5359/71 ms; FOV, 240 × 240 mm2; NEX, 2; matrix, 128×100; slice thickness, 4 mm; slice gap, 0.4 mm; FA, 90°; b values of 0 and 800 s/mm2 ).

***The First Affiliated Hospital of Soochow University (Center 3):*** The patients from The First Affiliated Hospital of Soochow Universitywere examined using the 3.0T SIEMENS Skyra MRI, the 3.0T SIEMENS Verio MRI, and the 1.5T Philips Ingenia Ambitions MRI.

The 3.0T SIEMENS Skyra MRI acquisition parameters were as follows: axial T2WI (TR/TE, 5000/77 ms; FOV, 200 × 200 mm2; NEX, 2; matrix, 640×640; slice thickness, 5 mm; slice gap, 6.5 mm; FA, 123° ) . Axial ceT1WI (TR/TE, 3.2/1.2 ms; FOV, 80 × 80 mm2; NEX, 5; matrix, 280×352; slice thickness, 3.5 mm; slice gap, 3 mm; FA, 9° ). Axial DWI (TR/TE, 8000/52 ms; FOV, 80 × 80 mm2; NEX, 2; matrix, 120×256; slice thickness, 6 mm; slice gap, 7.8 mm; FA, 90°; b values of 0 and 800 s/mm2 ).

The 3.0T SIEMENS Verio MRI acquisition parameters were as follows: axial T2WI (TR/TE, 7400/97 ms; FOV, 100 × 100 mm2; NEX, 2; matrix, 300×384; slice thickness, 8 mm; slice gap, 9.6 mm; FA, 120° ) . Axial ceT1WI (TR/TE, 3.9/1.9 ms; FOV, 80 × 80 mm2; NEX, 1; matrix, 260×320; slice thickness, 3 mm; slice gap, 3 mm; FA, 9° ). Axial DWI (TR/TE, 5400/61 ms; FOV, 80 × 80 mm2; NEX, 2; matrix, 312×384; slice thickness, 8 mm; slice gap, 9.6 mm; FA, 90°; b values of 0 and 800 s/mm2 ).

The 1.5T Philips Ingenia Ambitions MRI acquisition parameters were as follows: axial T2WI (TR/TE, 4151/85 ms; FOV, 260 × 260 mm2; NEX, 2; matrix, 512×512; slice thickness, 5 mm; slice gap, 5.5 mm; FA, 90° ) . Axial ceT1WI (TR/TE, 7.4/0 ms; FOV, 300 × 300 mm2; NEX, 1; matrix, 480×480; slice thickness, 5 mm; slice gap, 2.5 mm; FA, 10° ). Axial DWI (TR/TE, 4360/71 ms; FOV, 240 × 240 mm2; NEX, 2; matrix, 224×224; slice thickness, 5 mm; slice gap, 6 mm; FA, 90°; b values of 0 and 800 s/mm2 ).

***Changchun University of Chinese Medicine (Center 4):*** The patients from Changchun University of Chinese Medicine were examined using the 3.0T Philips Ingenia MRI and the 1.5T SIEMENS Espree MRI.

The 3.0T Philips Ingenia MRI acquisition parameters were as follows: axial T2WI (TR/TE, 5813/100 ms; FOV, 240 × 240 mm2; NEX, 1; matrix, 400×260; slice thickness, 3 mm; slice gap, 0.6 mm; FA, 90-125° ) . Axial ceT1WI (TR/TE, 457/8 ms; FOV, 300 × 380 mm2; NEX, 1; matrix, 300×330; slice thickness, 5 mm; slice gap, 1.5 mm; FA, 90-125° ). Axial DWI (TR/TE, 6000/63 ms; FOV, 380 × 380 mm2; NEX, 2; matrix, 152×182; slice thickness, 5 mm; slice gap, 1.5 mm; FA, 90°; b values of 0 and 800 s/mm2 ).

The 1.5T SIEMENS Espree MRI acquisition parameters were as follows: axial T2WI (TR/TE, 4070/109 ms; FOV, 285 × 380 mm2; NEX, 2; matrix, 308×270; slice thickness, 3 mm; slice gap, 0.6mm; FA, 150° ) . Axial ceT1WI (TR/TE, 898/11 ms; FOV, 260 × 380 mm2; NEX, 1; matrix, 300×330; slice thickness, 5 mm; slice gap, 1.5 mm; FA, 180° ). Axial DWI (TR/TE, 5300/79 ms; FOV, 292 × 400 mm2; NEX, 3; matrix, 400×293; slice thickness, 5 mm; slice gap, 1.5 mm; b values of 0 and 800 s/mm2 ).

**Supplementary Method S3.** Image preprocessing

All patients underwent pelvic MRI scans, including axial T2-weighted imaging (T2WI), axial diffusion-weighted imaging (DWI), and axial contrast-enhanced T1-weighted imaging(T1C). Image preprocessing encompassed the following steps. Firstly, all MR images were processed using N4 Bias Field Correction to eliminate intensity inhomogeneity. Secondly, in order to achieve segmentation or classification of cervical cancer based on multi-sequence images, we utilized T1C sequence as the fixed image and other sequences as the moving images. Image registration was conducted using a symmetric normalization algorithm that combined affine and deformable transformations, with mutual information serving as the optimization metric. This approach mapped the moving image into the fixed image, ensuring that the spatial positions of the two images were consistent. After that, based on patient images, adaptive normalizer was used to remove voxels with intensity values higher than 99% and lower than 1% of MR image. Finally, Max-min normalization was performed to unify all image intensity values within the range of 0 to 1.

**Supplementary Method S4.** Habitat analysis

**4.1 Habitat quantity determination**

Based on multi-parameter MR Images (T1C, DWI and T2WI), all the voxels of ROI regions from the three modalities were extracted for all patients in the training cohort. The clustering algorithm applied in this study was K-means, an iterative unsupervised machine learning algorithm by minimizing the Euclidean distance of each data points and the nearest centroid. Then, the target volumes were automatically divided into several spatially distinct habitats and each habitat demonstrates one coherent signal intensity pattern, and a set of cluster numbers ranging from 2 to 10 were used respectively. The optimal cluster number was determined according to their distortions, Davies-Bouldin (DB) Index and Calinski-Harabasz (CH) Index. This processing was performed using the scikit-learn package in Python.

Distortions: By drawing a line graph of different K values and the sum of the squared errors (SSE) values, if there is a "elbow point" (the inflection point where the descent rate sharply decreases) during the decline of SSE values, the corresponding K value of at this point can be considered as the appropriate cluster number.

Davies-Bouldin (DB) Index: DB calculates the sum of average intra-class distance of any two categories divided by the center distance of the two clusters to get the maximum value. Smaller DB means smaller distances within classes and larger distances between classes. The calculation formula of this index is as follows:


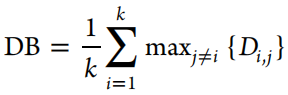


in which D*i*, *j* shows the within-to-between cluster distance ratio for the *i*th and *j*th clusters. k represents the number of clusters. D*i*,*j* can be defined as


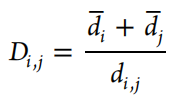


where d*i* represents the mean distance between each point in the *i*th cluster and the cluster’s centroid and d*i*,*j* denotes the Euclidean distance between the centroids of the *i*th and *j*th clusters.

Calinski-Harabasz (CH) Index: CH index measures the compactness of a class by calculating the square sum of the distance between each point in the class and the center of the class, and measures the separation of the data set by calculating the square sum of the distance between each center point and the center of the data set. CH index is obtained by the ratio of separation degree and compactness. Therefore, the larger CH is, the closer the class itself is, and the more scattered the classes are, namely, the better clustering result. It can be measured as


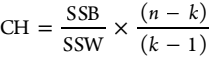


in which SSB shows the average between-clusters sum of squares. SSW indicates the average within-cluster sum of squares, *k* represents the number of clusters, and *n* denotes the number of observations. The average SSB is calculated as below


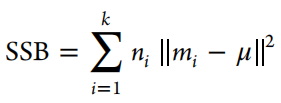


where m*i* is the centroid of cluster I, *μ* shows the mean of all data points, and ||m*i* – *μ*|| typifies the Euclidean distance between the centroid of the cluster and the mean of all data points. The formulation of mean SSW is computed as below


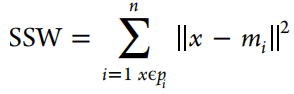


in which *k* indicates the number of clusters, *x* is a sample, p*i* demonstrates the *i*th cluster, m*i* shows the centroid of the cluster p*i*, and ||*x* – *mi*|| is the Euclidean distance between the sample and centroid of the cluster.

Finally, a cluster number of 2 was chosen because it demonstrated the best performance in terms of the Calinski-Harabasz score and Davies-Bouldin score, enabling a better display of habitat imaging differences.The results are shown in the table below.

| **Habitat number** | **Distortions** | **Calinski-Harabasz Index** | **Davies-Bouldin Index** |
| --- | --- | --- | --- |
| 2 | 0.1088 | **1201418.885** | **0.6993** |
| 3 | 0.0906 | 917803.7452 | 0.9675 |
| 4 | 0.0869 | 775582.6323 | 0.8819 |
| 5 | 0.0817 | 733467.9461 | 0.8627 |
| 6 | 0.0735 | 717128.6905 | 0.9110 |
| 7 | 0.0664 | 721391.6678 | 0.8674 |
| 8 | 0.0631 | 697174.3847 | 0.8765 |
| 9 | 0.0600 | 675056.991 | 0.8937 |
| 10 | 0.0567 | 663658.3914 | 0.8400 |

**4.2 Habitat subregion analysis**

Based on the habitats segmentation results of all patients, we calculated the volume of the entire ROI and the volume and volume proportion characteristics of each subregion, including five features ( Total_ROI_volume, Habitat1_volume, Habitat1_proportion, Habitat2_volume, and Habitat2_proportion).

Then, univariate analysis was applied to screen out the final features. A total of 3 features with statistical significance were selected for differentiation of recurrence risk stratification in patients with early-stage cervical carcinoma, including Total_ROI_volume, Habitat1_volume, and Habitat2_volume, which were significantly higher in positive risk group than that in low risk group. The results are shown in the table and figure below.

| **varible** | **coefficient** | **P value** | **Odds Ratio** | **lower** | **upper** |
| --- | --- | --- | --- | --- | --- |
| Habitat1_Proportion | 0.1555 | 0.2265 | 1.1682 | 0.9080 | 1.5031 |
| Habitat2_Proportion | -0.1555 | 0.2265 | 0.8560 | 0.6653 | 1.1013 |
| Habitat 1_Volume | 0.3216 | **0.0349** | 1.3793 | 1.0231 | 1.8597 |
| Habitat 2_Volume | 0.5822 | **0.0236** | 1.7899 | 1.0811 | 2.9637 |
| Total_ROI_Volume | 0.5850 | **0.0060** | 1.7950 | 1.1823 | 2.7254 |


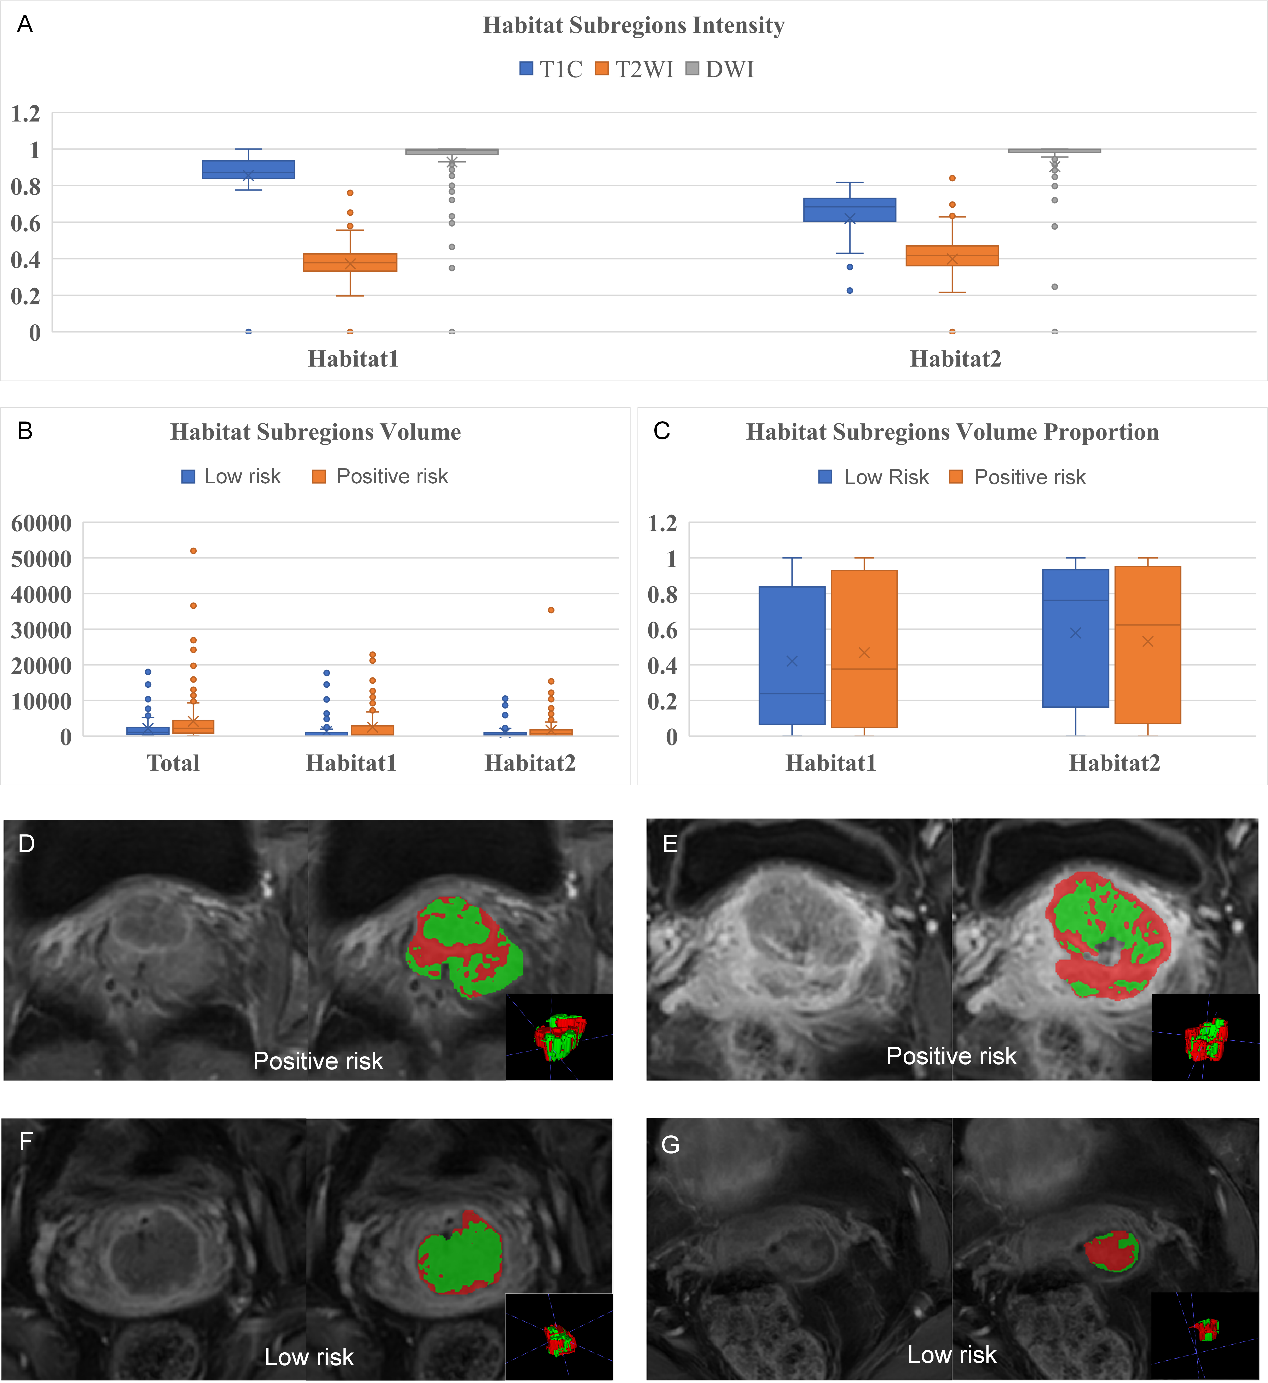


Subregion analysis charts. (A) Average intensity distribution of the two subregions on T1C, T2WI and DWI images; (B) The volume distribution of the whole mask and two subregions in the low risk and positive risk groups; (C) The volume proportion distribution of two subregions in low risk and positive risk groups; (D,E) Two examples of positive risk groups; (F,G) Two examples of low risk groups. Red represents Habitat 1 and green represents Habitat 2.

**Supplementary Figure S1.** The ROC curves, calibration curves and decision curve of various 2.5D DL classification models


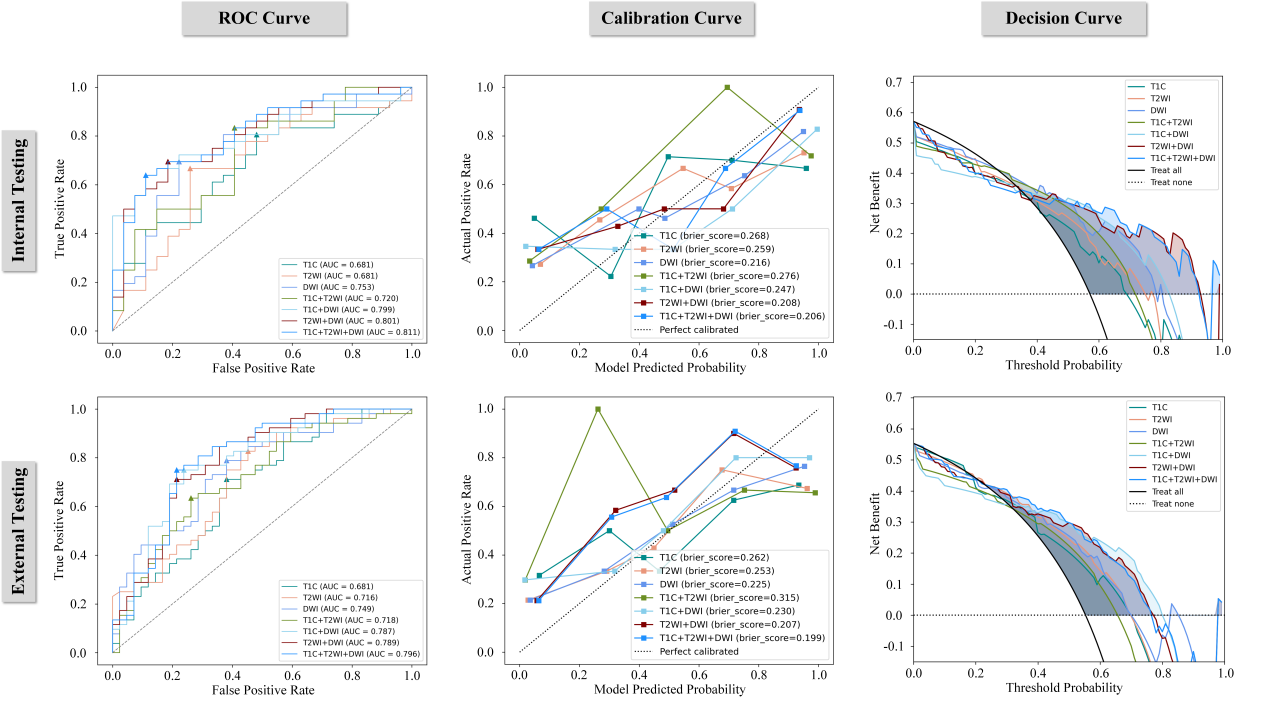


**Supplementary Table S1.** Prediction performance of different 2.5D DL models in the test cohort

| **Cohort** | **Model** | **Method** | **AUC** | **Sensitivity** | **Specificity** | **Accuracy** | **Precision** | **F1Score** |
| --- | --- | --- | --- | --- | --- | --- | --- | --- |
| Internal Testing cohort | T1C (n=2) | ConvNeXt | 0.681(0.534-0.822) | 0.722 | 0.556 | 0.651 | 0.684 | 0.703 |
|  | T2WI (n=5) | ConvNeXt | 0.681(0.520-0.831) | 0.778 | 0.556 | 0.683 | 0.700 | 0.737 |
|  | DWI (n=3) | ConvNeXt | 0.753(0.606-0.890) | 0.806 | 0.630 | 0.730 | 0.744 | 0.773 |
|  | T1C+T2WI (n=7) | L1_normalization>LDA>SVM | 0.720(0.592-0.849) | 0.806 | 0.593 | 0.714 | 0.725 | 0.763 |
|  | T1C+DWI (n=5) | YeoJohnson_transformer>LDA>QDA | 0.799(0.690-0.908) | 0.722 | 0.778 | 0.746 | 0.812 | 0.765 |
|  | T2WI+DWI (n=8) | YeoJohnson_transformer>LDA>Logistic | 0.801(0.692-0.911) | 0.667 | 0.815 | 0.730 | 0.828 | 0.738 |
|  | T1C+T2WI+DWI (n=10) | YeoJohnson_transformer>LDA>Logistic | 0.811(0.705-0.917) | 0.694 | 0.778 | 0.730 | 0.806 | 0.746 |
| External Testing cohort | T1C (n=2) | ConvNeXt | 0.681(0.541-0.804) | 0.750 | 0.524 | 0.649 | 0.661 | 0.703 |
|  | T2WI (n=5) | ConvNeXt | 0.716(0.595-0.828) | 0.827 | 0.524 | 0.691 | 0.683 | 0.748 |
|  | DWI (n=3) | ConvNeXt | 0.749(0.624-0.858) | 0.788 | 0.595 | 0.702 | 0.707 | 0.745 |
|  | T1C+T2WI (n=7) | L1_normalization>LDA>SVM | 0.718(0.614-0.823) | 0.827 | 0.476 | 0.670 | 0.662 | 0.735 |
|  | T1C+DWI (n=5) | YeoJohnson_transformer>LDA>QDA | 0.787(0.692-0.881) | 0.712 | 0.762 | 0.734 | 0.787 | 0.747 |
|  | T2WI+DWI (n=8) | YeoJohnson_transformer>LDA>Logistic | 0.789(0.694-0.884) | 0.712 | 0.786 | 0.745 | 0.804 | 0.755 |
|  | T1C+T2WI+DWI (n=10) | YeoJohnson_transformer>LDA>Logistic | 0.796(0.702-0.891) | 0.712 | 0.786 | 0.745 | 0.804 | 0.755 |
